# Supplementary material for: The Potential Role of Genic-SSRs in Driving Ecological Adaptation Diversity in Caragana Plants
Source: MDPI journal article supplement (doi:10.3390/ijms25042084), 2024-02-08
Supplement: s1 [file s1]

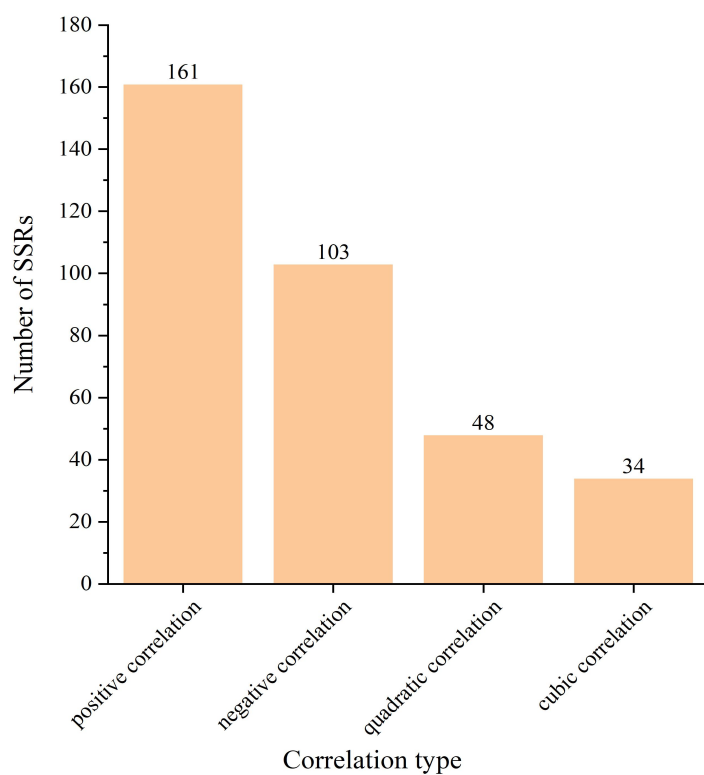

**Figure S3.** Correlation type quantity chart. The x-axis represents positive correlation, negative correlation, quadratic correlation, cubic correlation, the y-axis represents the number of SSRs loci.
