# Supplementary material for: The Potential Role of Genic-SSRs in Driving Ecological Adaptation Diversity in Caragana Plants
Source: MDPI journal article supplement (doi:10.3390/ijms25042084), 2024-02-08
Supplement: s1 [file s1]

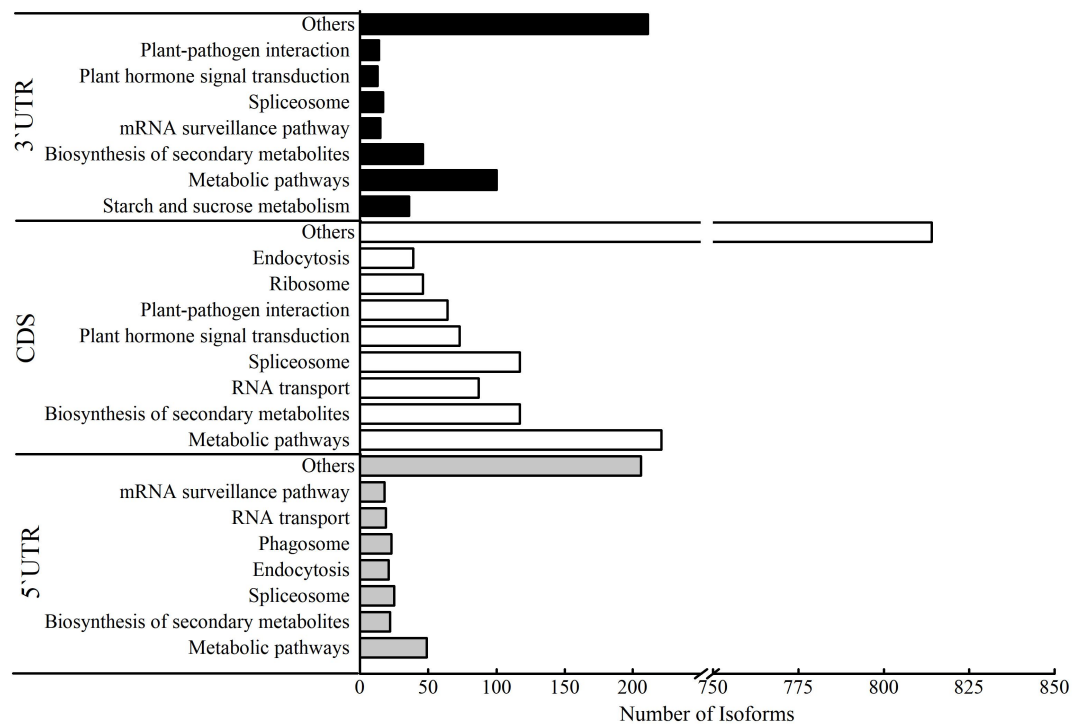

**Figure S2.** KEGG functional annotation results of gene sequences containing polymorphic Genic-SSRs loci. The x-axis represent the numbers of SSR-containing sequences enriched in KEGG pathways, the y-axis represent the enriched pathways assigned to the 5'UTR, CDSs, and 3'UTRs SSR-containing sequences.
