# Supplementary material for: The Potential Role of Genic-SSRs in Driving Ecological Adaptation Diversity in Caragana Plants
Source: MDPI journal article supplement (doi:10.3390/ijms25042084), 2024-02-08
Supplement: s1 [file s1]

**Table S1.** Sequencing output of thirteen *Caragana* species.

| <b>Samples</b>             | <b>Raw<br/>Reads(M)</b> | <b>Clean<br/>Reads(M)</b> | <b>Clean<br/>Bases(Gb)</b> | <b>Q20(%)</b> | <b>Q30(%)</b> | <b>Number of<br/>Unigene</b> |
|----------------------------|-------------------------|---------------------------|----------------------------|---------------|---------------|------------------------------|
| <i>C. tibetica</i> (IM)_1  | 42.33                   | 42.33                     | 4.23                       | 98.08         | 90.97         | 56,105                       |
| <i>C. tibetica</i> (IM)_2  | 42.33                   | 42.33                     | 4.23                       | 97.84         | 90.33         | 63,832                       |
| <i>C. tibetica</i> (IM)_3  | 42.33                   | 42.33                     | 4.23                       | 97.81         | 90.3          | 69,322                       |
| <i>C. korshinskii</i> _1   | 43.82                   | 42.11                     | 6.32                       | 97.59         | 93.53         | 64,058                       |
| <i>C. korshinskii</i> _2   | 43.82                   | 42.12                     | 6.32                       | 97.7          | 93.85         | 66,741                       |
| <i>C. korshinskii</i> _3   | 45.57                   | 42.77                     | 6.41                       | 97.62         | 93.63         | 67,649                       |
| <i>C. microphylla</i> _1   | 43.82                   | 42.26                     | 6.34                       | 97.55         | 93.44         | 69,203                       |
| <i>C. microphylla</i> _2   | 45.57                   | 43.6                      | 6.54                       | 97.53         | 93.42         | 66,787                       |
| <i>C. microphylla</i> _3   | 45.57                   | 42.88                     | 6.43                       | 97.61         | 93.6          | 61,667                       |
| <i>C. tibetica</i> (TB)_1  | 42.34                   | 42.34                     | 4.23                       | 97.5          | 88.97         | 60,421                       |
| <i>C. tibetica</i> (TB)_2  | 42.34                   | 42.34                     | 4.23                       | 97.38         | 88.7          | 63,945                       |
| <i>C. tibetica</i> (TB)_3  | 42.34                   | 42.34                     | 4.23                       | 97.53         | 88.96         | 63,882                       |
| <i>C. jubata</i> _1        | 43.82                   | 42.09                     | 6.31                       | 97.16         | 92.72         | 66,130                       |
| <i>C. jubata</i> _2        | 39.49                   | 37.55                     | 5.63                       | 97.12         | 92.73         | 59,497                       |
| <i>C. opulens</i> _1       | 42.33                   | 42.33                     | 4.23                       | 98.41         | 91.84         | 47,372                       |
| <i>C. opulens</i> _2       | 42.33                   | 42.33                     | 4.23                       | 98.41         | 91.84         | 51,818                       |
| <i>C. opulens</i> _3       | 42.33                   | 42.33                     | 4.23                       | 98.05         | 90.81         | 66,130                       |
| <i>C. roborovskiyii</i> _1 | 42.33                   | 42.33                     | 4.23                       | 97.78         | 90.35         | 89,740                       |
| <i>C. roborovskiyii</i> _2 | 42.33                   | 42.33                     | 4.23                       | 97.73         | 89.95         | 86,689                       |
| <i>C. roborovskiyii</i> _3 | 42.33                   | 42.33                     | 4.23                       | 97.99         | 90.92         | 87,483                       |
| <i>C. polourensis</i> _1   | 42.61                   | 42.61                     | 4.26                       | 98            | 91.03         | 53,124                       |
| <i>C. polourensis</i> _2   | 42.61                   | 42.61                     | 4.26                       | 97.92         | 90.68         | 60,410                       |
| <i>C. polourensis</i> _3   | 42.61                   | 42.61                     | 4.26                       | 97.89         | 90.63         | 58,969                       |
| <i>C. intermedia</i> _1    | 42.33                   | 42.33                     | 4.23                       | 97.87         | 90.57         | 76,508                       |
| <i>C. intermedia</i> _2    | 42.33                   | 42.33                     | 4.23                       | 97.78         | 90.23         | 112,247                      |
| <i>C. intermedia</i> _3    | 42.33                   | 42.33                     | 4.23                       | 97.83         | 90.13         | 85,253                       |
| <i>C. pygmaea</i> _1       | 42.33                   | 42.33                     | 4.23                       | 97.85         | 90.31         | 66,621                       |
| <i>C. pygmaea</i> _2       | 42.33                   | 42.33                     | 4.23                       | 97.96         | 90.55         | 71,544                       |
| <i>C. pygmaea</i> _3       | 42.33                   | 42.33                     | 4.23                       | 98.37         | 91.61         | 65,407                       |
| <i>C. stenophylla</i> _1   | 42.33                   | 42.33                     | 4.23                       | 97.79         | 89.89         | 52,692                       |
| <i>C. stenophylla</i> _2   | 42.33                   | 42.33                     | 4.23                       | 97.36         | 88.6          | 46,457                       |
| <i>C. stenophylla</i> _3   | 42.34                   | 42.34                     | 4.23                       | 98.33         | 91.42         | 59,649                       |
| <i>C. stenophylla</i> _1   | 42.34                   | 42.34                     | 4.23                       | 97.67         | 89.62         | 47,146                       |
| <i>C. stenophylla</i> _2   | 42.34                   | 42.34                     | 4.23                       | 97.41         | 89.83         | 52,942                       |
| <i>C. stenophylla</i> _3   | 42.34                   | 42.34                     | 4.23                       | 97.54         | 89.97         | 52,508                       |
| <i>C. brachypoda</i> _1    | 42.33                   | 42.33                     | 4.23                       | 97.72         | 89.97         | 87,097                       |
| <i>C. brachypoda</i> _2    | 42.33                   | 42.33                     | 4.23                       | 97.25         | 89.28         | 57,667                       |
| <i>C. brachypoda</i> _3    | 42.33                   | 42.33                     | 4.23                       | 97.84         | 90.06         | 56,365                       |

**Table S2.** Functional annotation of hubgenes related to functional traits.

| Hubgene        | SSR Type | Module    | Pfam Domain     | Functional Annotation                                                                               |
|----------------|----------|-----------|-----------------|-----------------------------------------------------------------------------------------------------|
| isoform_162345 | CCT      | green     | UPF0016         | Function unknown                                                                                    |
| isoform_219376 | TGA      | green     | PTPlike_phytase | Posttranslational modification, protein turnover, chaperones                                        |
| isoform_7662   | TTAATA   | green     | Pkinase         | Signal transduction mechanisms                                                                      |
| isoform_965    | TCA      | green     | NYN             | Function unknown                                                                                    |
| isoform_122092 | CTC      | green     | FH2             | Signal transduction mechanisms, Cytoskeleton                                                        |
| isoform_102491 | GGT      | green     | DEAD            | RNA processing and modification                                                                     |
| isoform_103046 | TTC      | green     | EF_TS           | Translation, ribosomal structure and biogenesis                                                     |
| isoform_272480 | AGC      | green     | CBS             | Energy production and conversion                                                                    |
| isoform_32586  | CTA      | green     | DUF3082         | Function unknown                                                                                    |
| isoform_195328 | CAG      | green     | HhH-GPD         | Replication, recombination and repair                                                               |
| isoform_174971 | ACA      | lightcyan | Myb_DNA-binding | Transcription                                                                                       |
| isoform_177007 | AG       | lightcyan | CBM49           | Carbohydrate transport and metabolism                                                               |
| isoform_102887 | GTG      | lightcyan | ATR13           | Translation, ribosomal structure and biogenesis                                                     |
| isoform_122483 | AGC      | lightcyan | RRM_1           | General function prediction only                                                                    |
| isoform_5055   | ATG      | lightcyan | PK_Tyr_Ser-Thr  | General function prediction only, Transcription                                                     |
| isoform_121721 | TCA      | lightcyan | FYTT            | General function prediction only                                                                    |
| isoform_11     | TGA      | purple    | HECT            | Posttranslational modification, protein turnover, chaperones, Transcription                         |
| isoform_146908 | TGA      | purple    | RSN1_7TM        | General function prediction only                                                                    |
| isoform_162420 | ATC      | purple    | TCP             | Transcription                                                                                       |
| isoform_167385 | ATG      | purple    | HSP90           | Posttranslational modification, protein turnover, chaperones                                        |
| isoform_198965 | CTT      | purple    | TPT             | Carbohydrate transport and metabolism, Amino acid transport and metabolism                          |
| isoform_251081 | CCT      | purple    | UPF0016         | Function unknown                                                                                    |
| isoform_28540  | CTC      | purple    | Inovirus_Gp2    | Function unknown                                                                                    |
| isoform_36764  | TTC      | purple    | Nkap_C          | Function unknown                                                                                    |
| isoform_5361   | TTC      | purple    | Reticulon       | Carbohydrate transport and metabolism, Posttranslational modification, protein turnover, chaperones |
| isoform_108413 | CCG      | salmon    | RMI1_N          | Function unknown                                                                                    |
| isoform_99746  | TTA      | salmon    | Fasciclin       | General function prediction only, Extracellular structures                                          |
| isoform_245042 | GAA      | salmon    | RRM_1           | RNA processing and modification                                                                     |
| isoform_236555 | ATG      | salmon    | HSP90           | Posttranslational modification, protein                                                             |

---

|                |     |           |                 |                                                              |
|----------------|-----|-----------|-----------------|--------------------------------------------------------------|
|                |     |           |                 | turnover, chaperones                                         |
| isoform_136771 | TGA | tan       | Glyco_transf_24 | Carbohydrate transport and metabolism                        |
| isoform_219649 | GGT | tan       | MPLKIP          | Function unknown                                             |
| isoform_3833   | AGA | tan       | Glyco_hydro_9   | Carbohydrate transport and metabolism                        |
| isoform_26815  | TC  | tan       | SLAC1           | Function unknown                                             |
| isoform_7366   | ATG | tan       | HSP90           | Posttranslational modification, protein turnover, chaperones |
| isoform_193867 | GCA | turquoise | Auxin_resp      | Signal transduction mechanisms, Transcription                |
| isoform_16437  | AGC | turquoise | RRM_1           | General function prediction only                             |
| isoform_24831  | TTC | turquoise | EF_TS           | Translation, ribosomal structure and biogenesis              |
| isoform_231681 | CTT | turquoise | F-box           | Function unknown                                             |

---

**Table S3** Functional annotation of hubgenes related to climate factors.

| Hubgene        | SSR Type | Module    | Pfam Domain     | Functional Annotation                                         |
|----------------|----------|-----------|-----------------|---------------------------------------------------------------|
| isoform_274508 | TGC      | blue      | Ribosomal_S5_C  | Translation, ribosomal structure and biogenesis               |
| isoform_12373  | GGTCA    | blue      | CBFB_NFYA       | Transcription                                                 |
| isoform_47582  | GAT      | blue      | EF1_GNE         | Transcription                                                 |
| isoform_51581  | ATT      | blue      | Snf7            | Intracellular trafficking, secretion, and vesicular transport |
| isoform_9712   | GAT      | blue      | Bcl-2_BAD       | Posttranslational modification, protein turnover, chaperones  |
| isoform_221678 | CCA      | blue      | Homeobox_KN     | Transcription                                                 |
| isoform_248044 | CGG      | blue      | LAGLIDADG_2     | General function prediction only                              |
| isoform_110445 | TGA      | blue      | NAP             | Replication, recombination and repair                         |
| isoform_17607  | GAA      | blue      | Na_Ca_ex        | Inorganic ion transport and metabolism                        |
| isoform_162345 | CCT      | green     | UPF0016         | Function unknown                                              |
| isoform_219376 | TGA      | green     | PTPlike_phytase | Posttranslational modification, protein turnover, chaperones  |
| isoform_7662   | TTAATA   | green     | Pkinase         | Signal transduction mechanisms                                |
| isoform_965    | TCA      | green     | NYN             | Function unknown                                              |
| isoform_122092 | CTC      | green     | FH2             | Signal transduction mechanisms, Cytoskeleton                  |
| isoform_102491 | GGT      | green     | DEAD            | RNA processing and modification                               |
| isoform_103046 | TTC      | green     | EF_TS           | Translation, ribosomal structure and biogenesis               |
| isoform_272480 | AGC      | green     | CBS             | Energy production and conversion                              |
| isoform_32586  | CTA      | green     | DUF3082         | Function unknown                                              |
| isoform_195328 | CAG      | green     | HhH-GPD         | Replication, recombination and repair                         |
| isoform_174971 | ACA      | lightcyan | Myb_DNA-binding | Transcription                                                 |
| isoform_177007 | AG       | lightcyan | CBM49           | Carbohydrate transport and metabolism                         |
| isoform_102887 | GTG      | lightcyan | ATR13           | Translation, ribosomal structure and biogenesis               |
| isoform_122483 | AGC      | lightcyan | RRM_1           | General function prediction only                              |
| isoform_5055   | ATG      | lightcyan | PK_Tyr_Ser-Thr  | General function prediction only, Transcription               |
| isoform_121721 | TCA      | lightcyan | FYTT            | General function prediction only                              |

**Table S4.** Characteristics of 16 validated genic-SSRs for *Caragana*.

| Primer ID  | Repeat Motif | Primer Sequence                                        | $N_A$ | $H_o$ | $H_e$ | $PIC$ |
|------------|--------------|--------------------------------------------------------|-------|-------|-------|-------|
| CPSSR_566  | AGC          | F: TAACCATGCGGGGCTTTCTT<br>R: CCCACTCTCAGCAGCATCAA     | 3     | 0.381 | 0.292 | 0.501 |
| CPSSR_1710 | CTC          | F: GGTCTTCACCATCCGACCAC<br>R: GCGGAGGAAGAAGCTGAAGA     | 4     | 0.256 | 0.278 | 0.603 |
| CPSSR_2702 | GGT          | F: GGCATGTGGCTAGACAGTGT<br>R: CATGTCCACGACCTCCACAA     | 5     | 0.290 | 0.305 | 0.686 |
| CPSSR_3379 | TGC          | F: TGACGATTCCAAAGGCCACA<br>R: ACGAGGATGCACAACCTACCTG   | 6     | 0.108 | 0.144 | 0.654 |
| CPSSR_1221 | CAC          | F: TACATGAGGCCACCACAACC<br>R: GGAGGGGAAGGAGTCTGGTA     | 4     | 0.371 | 0.283 | 0.438 |
| CPSSR_2805 | GTTTT        | F: ACCCCATTTTACACTGCTTGC<br>R: AGGGTTAAAGAAGAGTCTGTGCA | 5     | 0.232 | 0.438 | 0.637 |
| CPSSR_1394 | CAT          | F: TGAAGAATGCACAGCTATGGC<br>R: ACACACATTCTTGAGGGTGT    | 3     | 0.360 | 0.269 | 0.605 |
| CPSSR_2888 | TAAA         | F: GCCTCGTCTTGACTCTGGTT<br>R: TCCTTCTGCCACAACCCAAG     | 5     | 0.323 | 0.316 | 0.722 |
| CPSSR_292  | ACC          | F: CATGTTCCACCACCCTCCAC<br>R: CTGCTGAGGACCGGGATAAC     | 2     | 0.294 | 0.253 | 0.563 |
| CPSSR_2728 | GT           | F: GGATGCGCAACAATTCCTCAT<br>R: CGAAAACCCAGCCAGATCT     | 11    | 0.278 | 0.560 | 0.863 |
| CPSSR_3518 | TGGAAA       | F: GGGCTAGTGAGATTGGTGCT<br>R: GCAGAGGAATTTCCCACTGGA    | 4     | 0.198 | 0.170 | 0.682 |
| CPSSR_3621 | TTC          | F: TCTTCCCCTTCATACCCTCCA<br>R: GAGCTAGTTGAGGTGGCACA    | 9     | 0.511 | 0.502 | 0.785 |
| CPSSR_2641 | GGA          | F: TCGGACGAGGACTATGTGGT<br>R: TCTGCTGACCACAAATGCCA     | 3     | 0.212 | 0.223 | 0.307 |
| CPSSR_3645 | TTG          | F: CTACTGGCAAGCACCATCGA<br>R: CCATCATTCTTCTGGCCCTGA    | 2     | 0.067 | 0.100 | 0.329 |
| CPSSR_2779 | GTG          | F: TCCACTGGTCTCAACGTTTCG<br>R: TGTGCCTCAACTGAGCACTC    | 3     | 0.347 | 0.306 | 0.518 |
| CPSSR_1512 | CCG          | F: CCACCCAAATCCCCTCAACA<br>R: AGAGTGAAGAGGGGTTTCGGT    | 3     | 0.056 | 0.086 | 0.279 |

Note:  $N_A$ ,  $H_o$ ,  $H_e$  and  $PIC$  represent allele number, observed heterozygosity, expected heterozygosity and polymorphism information content, respectively.
