# Supplementary material for: The Potential Role of Genic-SSRs in Driving Ecological Adaptation Diversity in Caragana Plants
Source: MDPI journal article supplement (doi:10.3390/ijms25042084), 2024-02-08
Supplement: s1 [file s1]

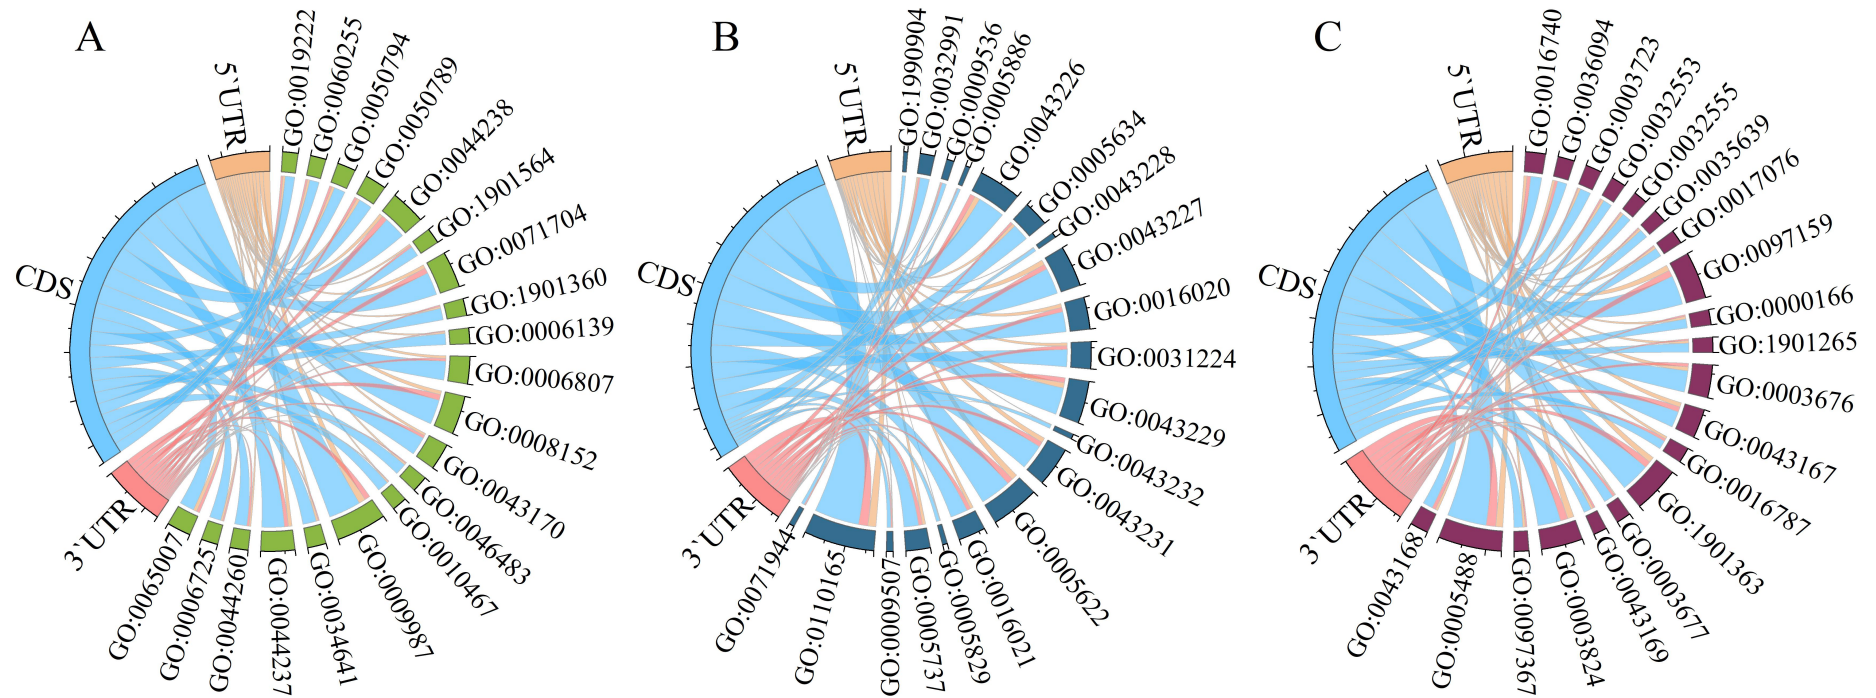

**Figure S1.** Go functional annotation of genes containing polymorphic Genic-SSRs. (A–C) represent the annotation results in the three main GO categories, i.e., biological process, cellular component, and molecular function.
