# Supplementary material for: The Potential Role of Genic-SSRs in Driving Ecological Adaptation Diversity in Caragana Plants
Source: MDPI journal article supplement (doi:10.3390/ijms25042084), 2024-02-08
Supplement: s1 [file s1]

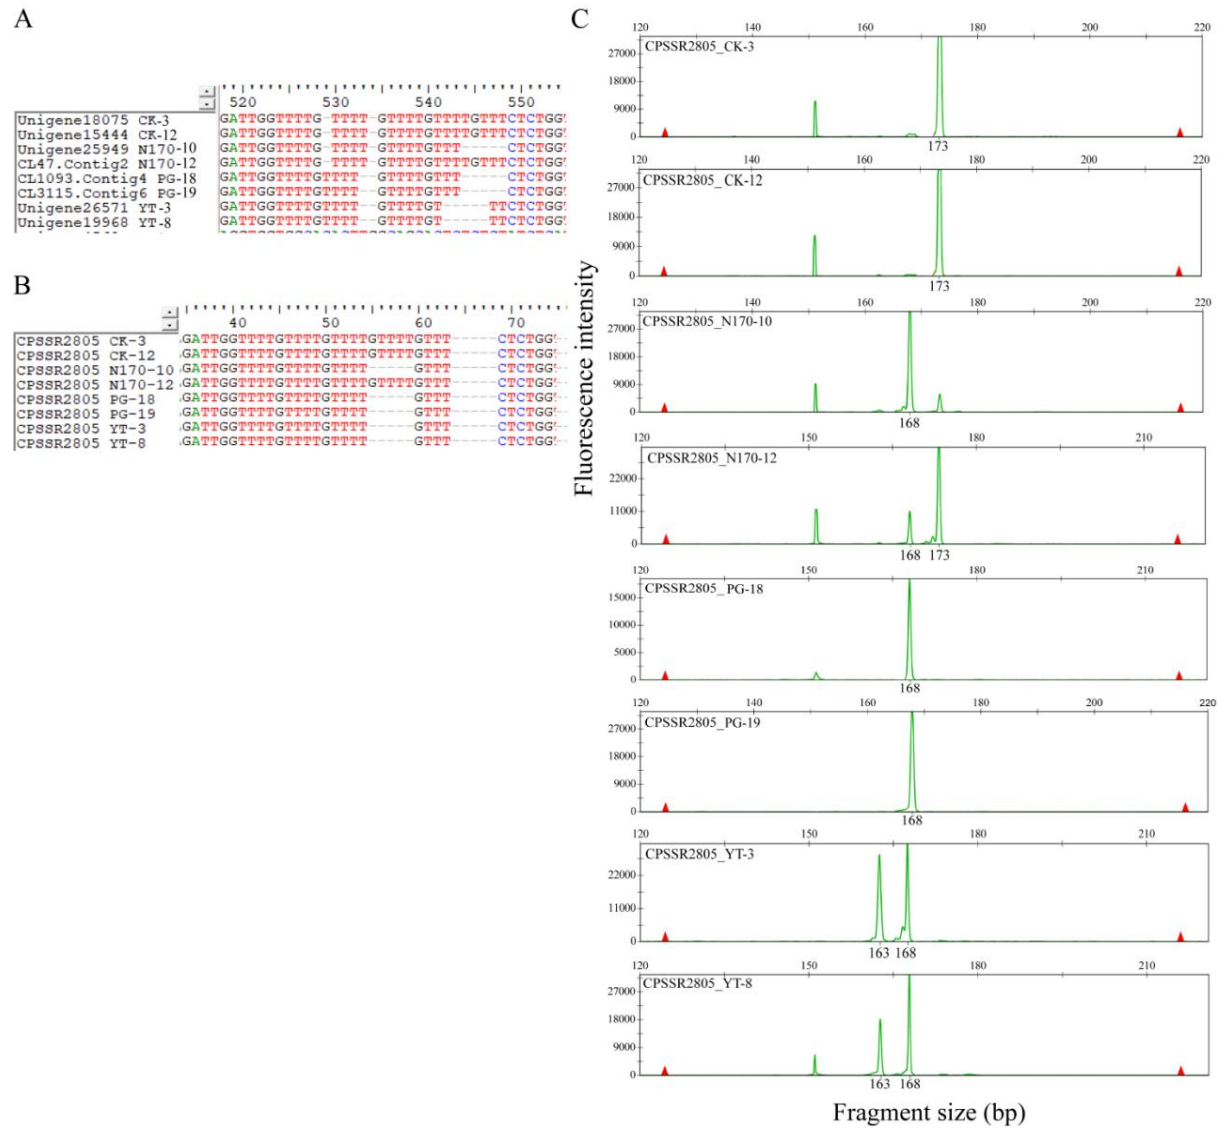

**Figure S4.** Verification results for CPSSR\_2805 (GTTTTT). (A) multiple sequence alignment of the assembled sequences containing CPSSR\_2805 in the eight *Caragana* transcriptome datasets; (B) sequencing results of the PCR products in (C); (C) the capillary electrophoresis results of CPSSR\_2805 in eight *Caragana* individuals.
